# Supplementary material
Source: PubMed Central journal article supplement (PMC3517249)
Supplement: supp_tpc.112.103002_tpc103002Supplemental.pdf [file supp_tpc.112.103002_tpc103002Supplemental.pdf]

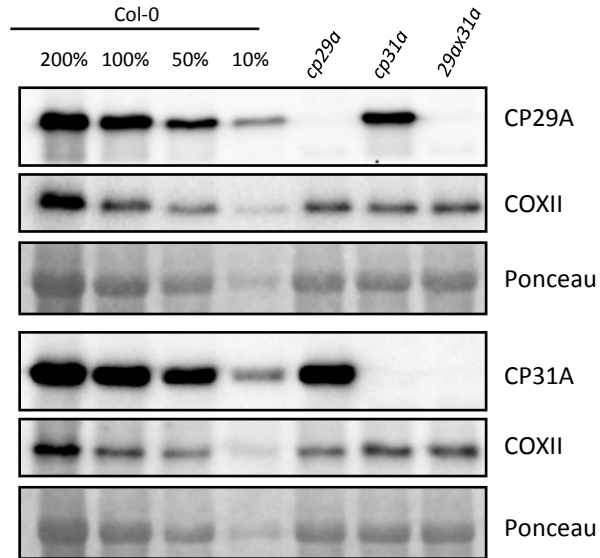

**Supplemental Fig. 1: CP29A- and CP31A- protein levels are not altered by the presence or absence of CP31A and CP29A, respectively.**

Immunoblots were performed with equal amounts of *cp29a*- and *cp31a*- single and double mutant total protein extracts and compared to a dilution series (200%, 100%, 50%, 10%) of a Col-0 total protein extract. The same blots were stripped and reprobbed with antisera against the mitochondrial protein COXII. To demonstrate equal loading of samples, Ponceau-stained RbcL is shown to further support equal loading.

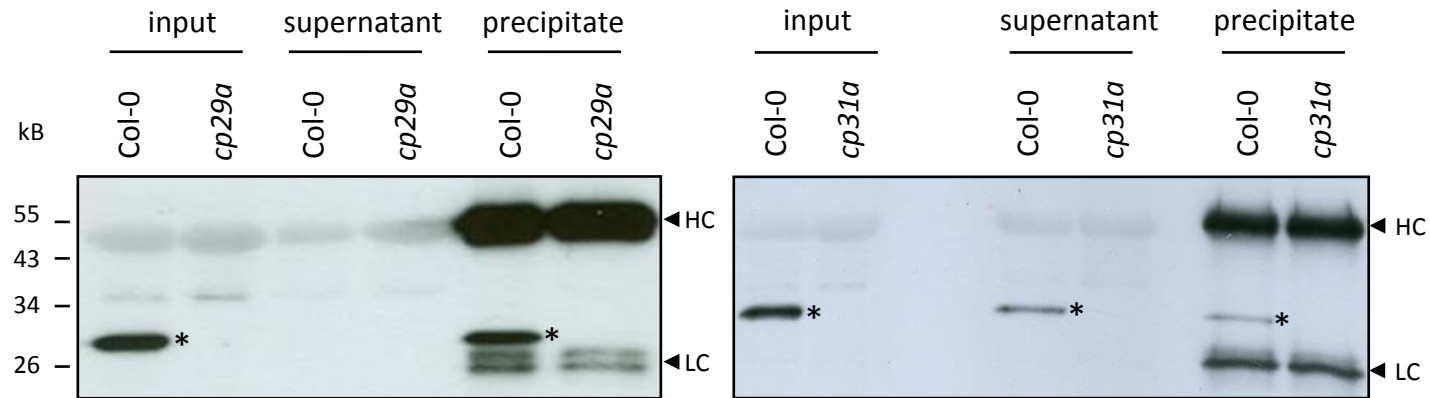

### Supplemental Figure 2: Immunoprecipitation of CP29A and CP31A

Immunoblot analyses of immunoprecipitation experiments with anti-CP29A- and anti-CP31A-antibodies, respectively. Stromal extracts from Col-0 and the corresponding knockout mutants (input) were analyzed together with aliquots from precipitates and supernatants generated by immunoprecipitations. A twentieth of the total supernatant and a twentieth of the pellet fraction were loaded on the gel. CP29A and CP31A are indicated by asterisks. Arrowheads point to subunits of the antibody used (heavy chain HC, light chain LC).

IP using pre-immune serum

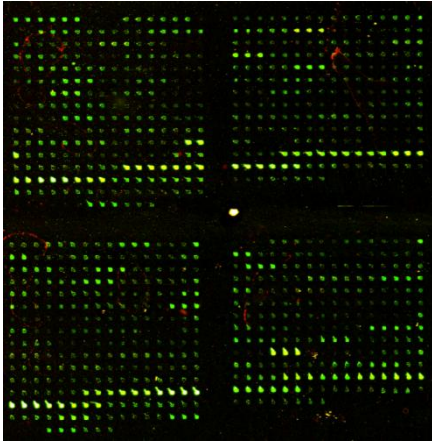

IP using anti-CP31A antibody

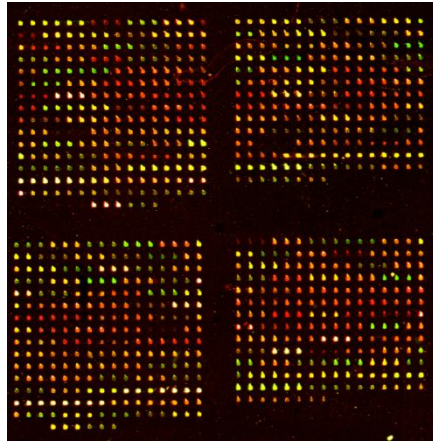

**Supplemental Figure 3: Excerpt of a representative CP31A-RIP-Chip.**

Overlays of fluorescence signals from pellet (Cy5; red) and supernatant (Cy3; green) of a representative CP31A- IP are shown. In the control-IP performed with pre-immune serum (left) RNA can be detected in the supernatant fraction (green fluorescence), but is almost absent from the pellet (no red or yellow signals). In the IP using the anti- CP31A- antibody (right) strong signals are obtained within the precipitate (red fluorescence). Both Chips were scanned using the same laser intensities.

|            | S           | P | S           | P | S           | P | S           | P | S           | P | S                  | P |
|------------|-------------|---|-------------|---|-------------|---|-------------|---|-------------|---|--------------------|---|
| anti-CP29A |             |   |             |   |             |   |             |   |             |   |                    |   |
| anti-CP31A |             |   |             |   |             |   |             |   |             |   |                    |   |
| anti- HA   |             |   |             |   |             |   |             |   |             |   |                    |   |
|            | <i>atpH</i> |   | <i>psbD</i> |   | <i>psaA</i> |   | <i>atpB</i> |   | <i>rbcL</i> |   | <i>psbB</i>        |   |
|            |             |   |             |   |             |   |             |   |             |   | <i>ndhF 3'-UTR</i> |   |

|            | S               | P | S            | P |
|------------|-----------------|---|--------------|---|
| anti-CP29A |                 |   |              |   |
| anti-CP31A |                 |   |              |   |
| anti- HA   |                 |   |              |   |
|            | <i>ycf3 in1</i> |   | <i>rpl33</i> |   |

|            | S           | P | S            | P |
|------------|-------------|---|--------------|---|
| anti-CP29A |             |   |              |   |
| anti-CP31A |             |   |              |   |
| anti- HA   |             |   |              |   |
|            | <i>trnI</i> |   | <i>rrn16</i> |   |

**Supplemental Figure 4: Dot blot analyses for validation of RIP-Chip data.**

RNAs were isolated from the precipitate and the supernatant of a representative CP29A- and a CP31A-immunoprecipitation, spotted onto uncharged nylon membranes and hybridized with <sup>32</sup>P- labeled riboprobes (see Suppl. Table1 online for primers). The upper panel displays dot blot hybridization of RNAs that were highly enriched in RIP-Chips, in the middle panel RNAs with moderate enrichment in RIP-Chips were selected and RNAs in the lower panel showed no enrichment in our RIP-Chips experiments. S = supernatant; P = precipitate.

| gene         | genome position | Col-0 | cp29a |
|--------------|-----------------|-------|-------|
| <i>matK</i>  | 2931            |       |       |
| <i>atpF</i>  | 12707           |       |       |
| <i>rpoC1</i> | 21806           |       |       |
| <i>rpoB</i>  | 23898           |       |       |
| <i>rpoB</i>  | 25779           |       |       |
| <i>rpoB</i>  | 25992           |       |       |
| <i>psbZ</i>  | 35800           |       |       |
| <i>rps14</i> | 37092           |       |       |
| <i>rps14</i> | 37161           |       |       |
| <i>accD</i>  | 57868           |       |       |
| <i>accD</i>  | 58642           |       |       |
| <i>psbF</i>  | 63985           |       |       |
| <i>psbE</i>  | 64109           |       |       |
| <i>petL</i>  | 65716           |       |       |
| <i>rps12</i> | 69553           |       |       |
| <i>clpP</i>  | 69942           |       |       |
| <i>rpoA</i>  | 78691           |       |       |

| gene         | genome position | Col-0 | cp29a |
|--------------|-----------------|-------|-------|
| <i>rpl23</i> | 86055           |       |       |
| <i>ndhB</i>  | 94999           |       |       |
| <i>ndhB</i>  | 95225           |       |       |
| <i>ndhB</i>  | 95608           |       |       |
| <i>ndhB</i>  | 95644           |       |       |
| <i>ndhB</i>  | 95650           |       |       |
| <i>ndhB</i>  | 96419           |       |       |
| <i>ndhB</i>  | 96579           |       |       |
| <i>ndhB</i>  | 96698           |       |       |
| <i>ndhB</i>  | 97016           |       |       |
| <i>ndhF</i>  | 112349          |       |       |
| <i>ndhD</i>  | 116281          |       |       |
| <i>ndhD</i>  | 116290          |       |       |
| <i>ndhD</i>  | 116494          |       |       |
| <i>ndhD</i>  | 116785          |       |       |
| <i>ndhD</i>  | 117166          |       |       |
| <i>ndhG</i>  | 118858          |       |       |

### Supplemental Figure 5: Editing in cp29A

Leaves from 3 weeks old Col-0 and *cp29a* plants were used for total RNA isolation and subsequent cDNA amplification. PCR products from RT-PCRs harboring all 34 Arabidopsis plastid editing sites were sequenced (Primers are listed in Suppl. Table1 online). Excerpts of sequencing chromatographs each showing a triplet, which harbors the editing site in the middle, are displayed. Genome positions are given according to the Arabidopsis plastid genome annotation (Genebank accession: AP000423; Sato et al., 1999).

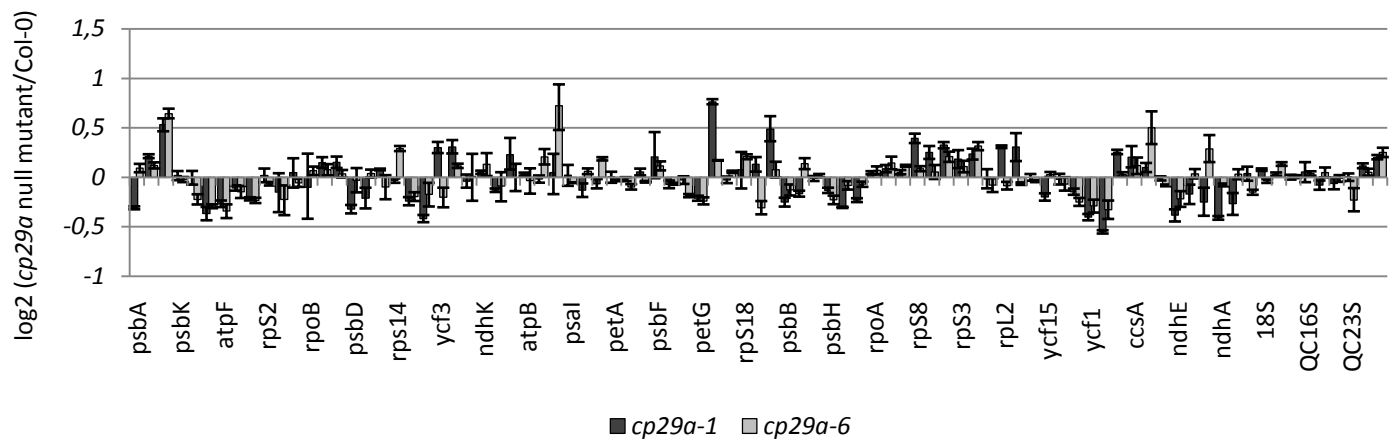

**Supplemental Figure 6: Plastid transcript levels in two *cp29a*-mutants.**

Transcript quantities assayed by qRT-PCR are shown as log<sub>2</sub> of the ratios of transcript amounts in mutant versus wild-type extracts. The resulting values were normalized to the median of expression ratios (mutant/WT) of all chloroplast genes analyzed. The cytosolic 18S rRNA was used as a non-plastid control. Genes are sorted by their physical location on the plastome. The full data set is given in Suppl. Table2 online.

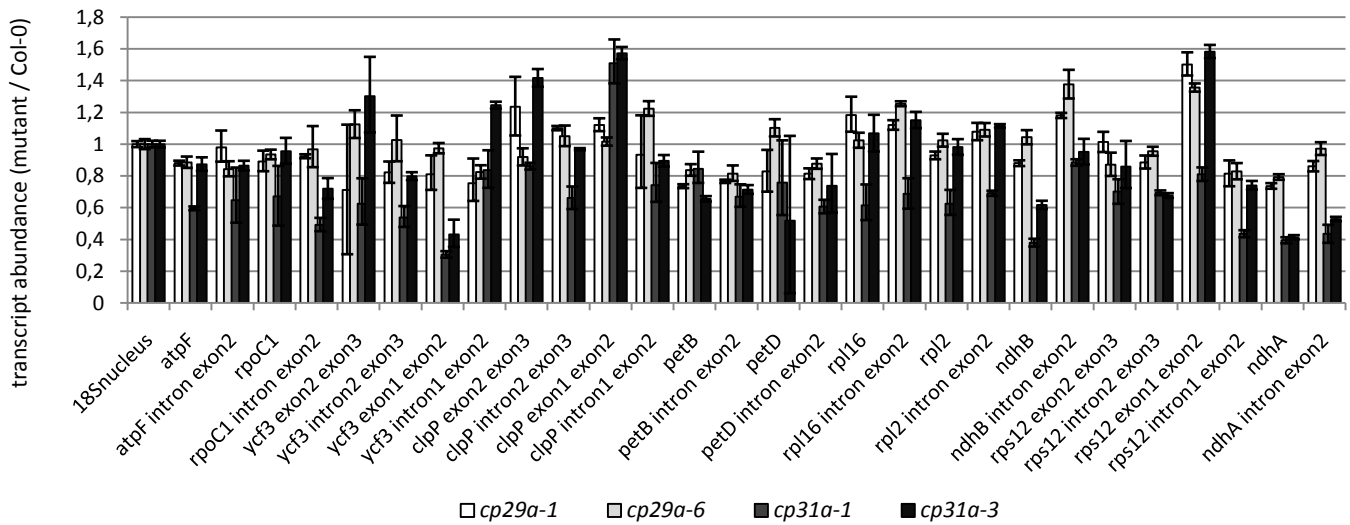

### Supplemental Figure 7: Splicing analyses in cpRNP mutants.

Quantitative RT-PCR was used to analyze spliced and unspliced introns in *cp29a* and *cp31a* mutants compared with wild-type plants. Data are normalized to control amplifications of cDNA for nuclear 18S rRNA. There is a reduction in the accumulation of several spliced, but not unspliced RNAs in *cp31a* mutants (*ycf3* first intron; *rpoC1*, *ndhB*). The other splicing events are not or only mildly affected in both mutants. The full data set is given in Suppl. Table.4 online.

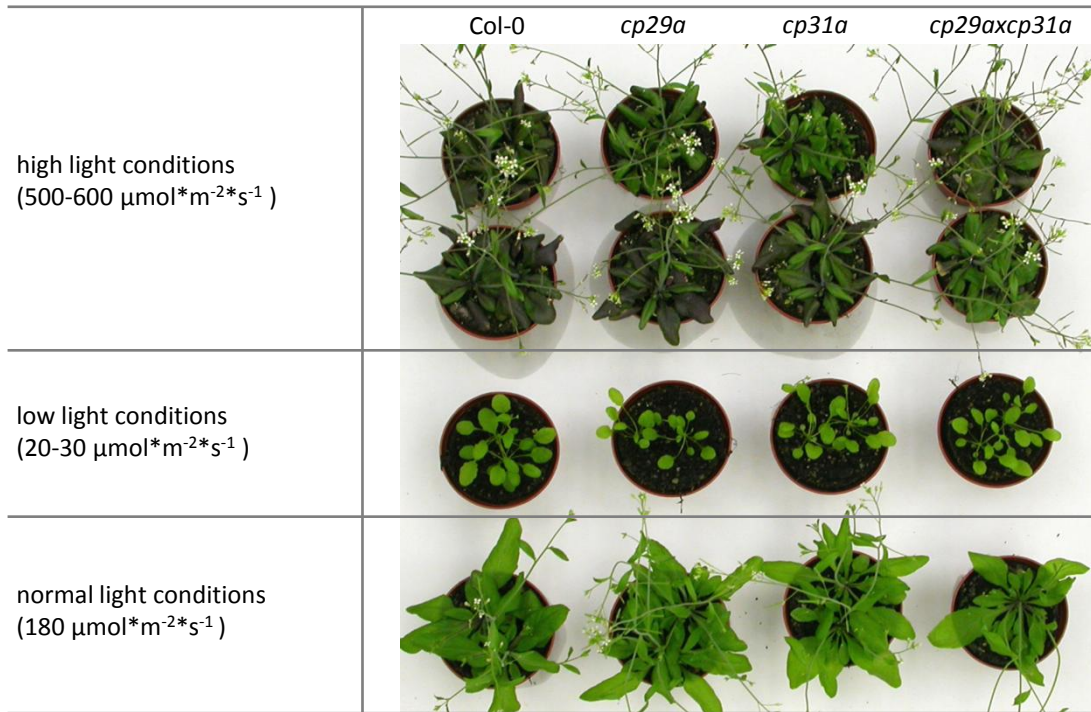

### Supplemental Figure 8: Light stress phenotypes

Col-0 plants and *cp29a*, *cp31a* and *cp29axcp31a* mutants were grown under standard growth conditions (long day [16 h light/ 8 h dark]; normal light [ $180 \mu\text{mol}\cdot\text{m}^{-2}\cdot\text{s}^{-1}$ ]) for 12 days and then shifted to either high light ( $500\text{-}600 \mu\text{mol}\cdot\text{m}^{-2}\cdot\text{s}^{-1}$ ; upper panel) or low light ( $20\text{-}30 \mu\text{mol}\cdot\text{m}^{-2}\cdot\text{s}^{-1}$ ; middle panel) or kept at the primary standard conditions (lower panel) for three weeks.



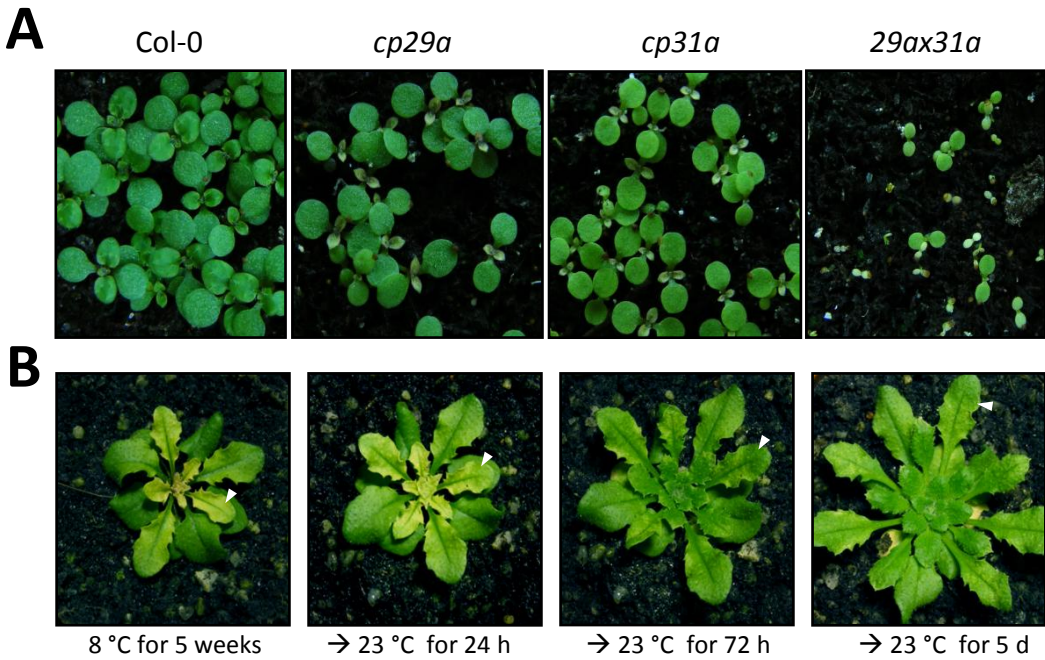

**Supplemental Figure 9: Phenotypes of *cp29a*- and *cp31a*- single and double mutants germinated under cold stress conditions.**

Seeds from Col-0 plants and from *cp29a*, *cp31a*, and *cp29axcp31a* mutants were germinated and grown at 8 °C for three weeks.

A *cp29a* x *cp31a* double mutant was germinated and grown for 5 weeks at 8°C and then shifted to 23 °C . The phenotype was documented 0 h, 24 h, 72 h and 5 days after the low temperature stress. Arrowhead indicates same leaf in all four pictures.

**A**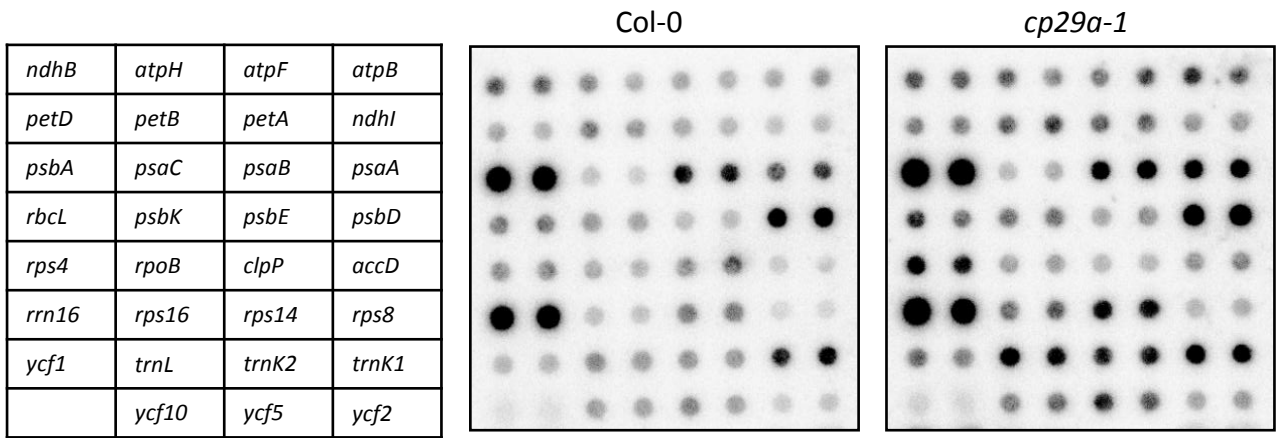**B**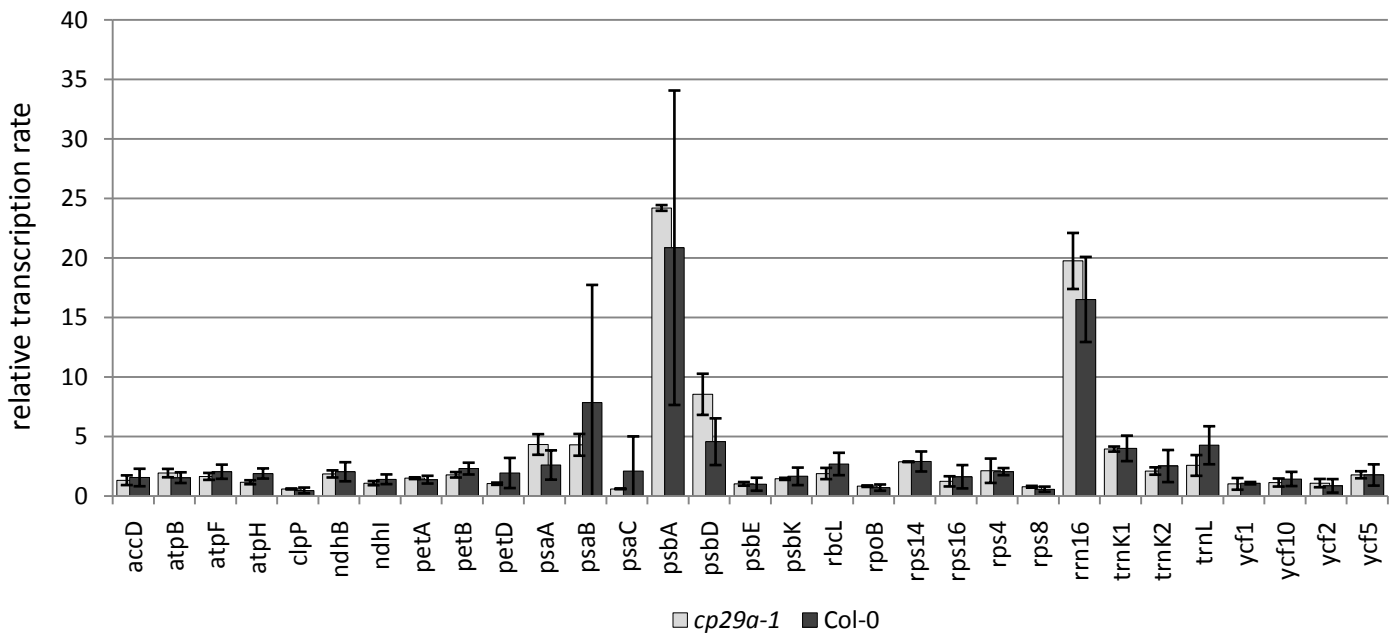

**Supplemental Figure 10: Run-on transcription assay of selected chloroplast genes in a *cp29a-1* knockout mutant.**

Relative transcription rates in the *cp29a-1* mutant and the wildtype (Col-0) were determined as described (Zubo et al., 2008).

**(A)** Hybridisation of  $^{32}\text{P}$ - labeled chloroplast RNA from Col-0 and *cp29a-1* seedlings with a macroarray containing DNA-probes for 31 selected chloroplast genes. Signals were detected using the Personal Molecular Imager (PMI) System (Bio-Rad).

**(B)** represents the quantification of (A) Autoradiographs from wild-type and the *cp29a-1*- mutant shown in (A) were quantified using the Quantity One Software (Biorad). The relative transcription rates were obtained by calculating wild-type to mutant ratios (see also Suppl. Table.3 online).

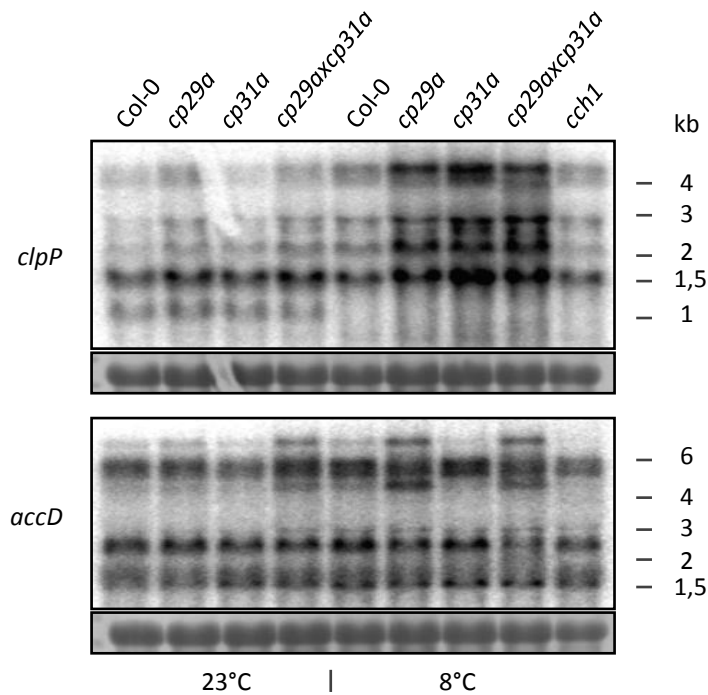

**Supplemental Figure 11: Transcript accumulation of selected NEP-dependent mRNAs under standard- (23 °C) and cold stress (8 °C) conditions.**

4 µg of total RNA from 2 weeks old whole plants grown at 23 °C (left) and from bleached tissue after 18 days of cold stress (right) were fractionated on denaturing agarose gels and analyzed by hybridization to <sup>32</sup>P- labeled riboprobes for the plastid RNAs *clpP* and *accD*. Equal loading was controlled by methylene blue staining (cytosolic 25S rRNA is shown).

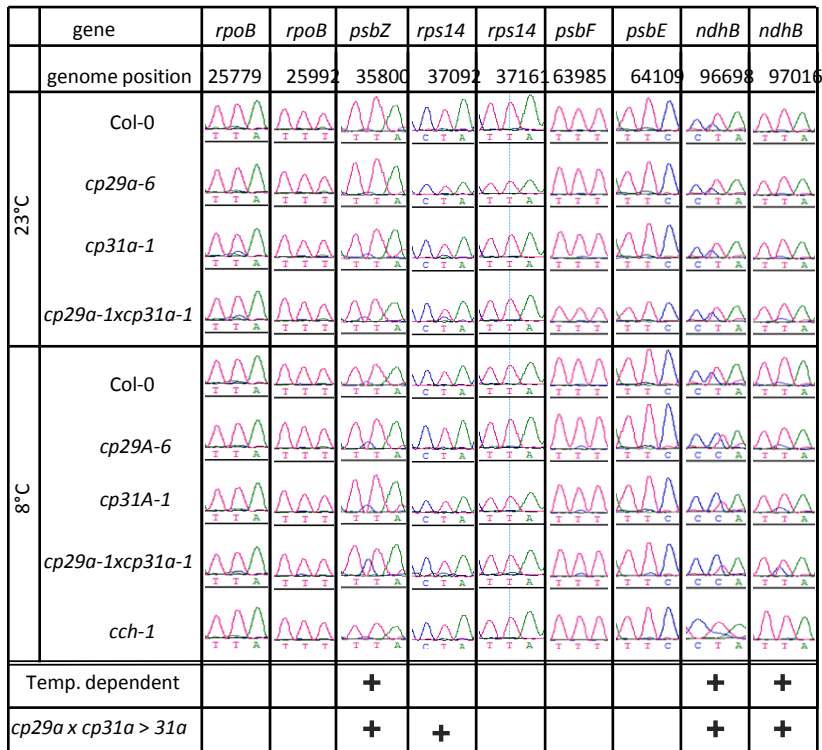

### Supplemental Figure 12: Analysis of chloroplast RNA editing in cpRNP mutants.

cDNAs were prepared from total leaf RNA from wild-type, *cp31a* and *cp29a* mutants, either grown at standard growth temperatures for 18 days or additionally cold-stressed for three weeks. Selected cDNAs were amplified by PCR and sequenced to identify changes in RNA-editing site processing. Excerpts of sequencing chromatograms are displayed with the editing site always being in the centre of the base triplet shown. Overall, effects on RNA editing either by genotype or by low temperatures were only mild. Most prominently, editing of the site in *psbZ* is reduced after cold treatment, in particular in double mutants. Similarly, RNA editing of the two sites in the *ndhB* transcript decreases in cpRNP mutants in a temperature-dependent manner (indicated by plus signs below the chart). Parallel analysis of *cch* mutants demonstrates that the defects observed are specific for cpRNP mutants.

**Supplemental Table 1: Oligonucleotides**

| Oligonucleotide   | Sequence (5'>3')                             | Target(s)    | Purpose                             |
|-------------------|----------------------------------------------|--------------|-------------------------------------|
| accD_for          | TTCATTTGTAGTGAAAGCGG                         | <i>accD</i>  | riboprobe for Northern              |
| accD_T7_rev       | GTAATACGACTCACTATAGGGTTCGCTACTACGGATCCC      | <i>accD</i>  | riboprobe for Northern              |
| atpB_for2         | GGAATGGACGTGGTTGATATGG                       | <i>atpB</i>  | riboprobe for dot blot              |
| atpB_T7_rev2      | TAATACGACTCACTATAGGGCAGTCAGACCAACTCTCATACG   | <i>atpB</i>  | riboprobe for dot blot              |
| atpH5'_for        | GATTTAGATAGGGATTGATTAG                       | <i>atpH</i>  | riboprobe for dot blot              |
| atpH5'_T7_rev     | GTAATACGACTCACTATAGGGTCCAGGTCCAATAGAAGCAAG   | <i>atpH</i>  | riboprobe for dot blot              |
| clpP_ex2_for      | GAGGTTGATACCGAAATCTCG                        | <i>clpP</i>  | riboprobe for Northern              |
| clpP_ex2_T7_rev   | GTAATACGACTCACTATAGGGCGTTTGGTAATTGCTCCTCC    | <i>clpP</i>  | riboprobe for Northern              |
| ndhB_ex1_for      | CTGAGCAATCGCAATAATCG                         | <i>ndhB</i>  | riboprobe for Northern              |
| ndhB_ex1_T7_rev   | GTAATACGACTCACTATAGGGTACCGGAAGTATAACATTTCG   | <i>ndhB</i>  | riboprobe for Northern              |
| petB_for          | CGTCCAACCGTTACTGAAGC                         | <i>petB</i>  | riboprobe for Northern              |
| petB_T7_rev       | GTAATACGACTCACTATAGGGAATAGCGTCAGGTACACC      | <i>petB</i>  | riboprobe for Northern              |
| psaA_for          | TGGCATGTATTTCCATGGTG                         | <i>psaA</i>  | riboprobe for Northern and dot blot |
| psaA_T7_rev       | GTAATCGACTCACTATAGGGAACCAAGCCAATTTGGAG       | <i>psaA</i>  | riboprobe for Northern and dot blot |
| psbB_for          | TTTGCAGCTTTTGTGTTGC                          | <i>psbB</i>  | riboprobe for Northern and dot blot |
| psbB_T7_rev       | GTAATACGACTCACTATAGGGCTTCTAACGGGACGTCAGC     | <i>psbB</i>  | riboprobe for Northern and dot blot |
| psbD_for          | CTATTTTCGTTTAGGGGGTTGG                       | <i>psbD</i>  | riboprobe for Northern and dot blot |
| psbD_T7_rev       | TAATACGACTCACTATAGGGCAGCAATGGGACCAGAGAATGC   | <i>psbD</i>  | riboprobe for Northern and dot blot |
| psbF_for          | GTCTGGAAGCACAGGAGAACG                        | <i>psbF</i>  | riboprobe for Northern              |
| psbF_T7_rev       | GTAATACGACTCACTATAGGGCAAACGGCCTGTTATTAATGG   | <i>psbF</i>  | riboprobe for Northern              |
| rbcl_for          | GCAGCATTCCGAGTAATCC                          | <i>rbcl</i>  | riboprobe for Northern and dot blot |
| rbcl_T7_rev       | GTAATACGACTCACTATAGGGCCACGTAGACATTCATAAACTGC | <i>rbcl</i>  | riboprobe for Northern and dot blot |
| rpl33_for         | ATGGCCAAGGGTAAAGATGTTTCG                     | <i>rpl33</i> | riboprobe for Northern and dot blot |
| rpl33_T7_rev      | GTAATACGACTCACTATAGGGCTCAATTCGAATCGACTAGG    | <i>rpl33</i> | riboprobe for Northern and dot blot |
| rps4_rp           | CGTCTGGGGGCTTTACCGGG                         | <i>rps4</i>  | riboprobe for Northern              |
| rps4_T7           | GTAATACGACTCACTATAGGGTGGTTTGCAATTCCTCAGGGGC  | <i>rps4</i>  | riboprobe for Northern              |
| rrn16_for         | ATGGATACTAGGCGCTGTGC                         | 16 S rRNA    | riboprobe for Northern and dot blot |
| rrn16_T7_rev      | GTAATCGACTCACTATAGGGACCTTCTCCGGCTTATCAC      | 16 S rRNA    | riboprobe for Northern and dot blot |
| rrn23_3'_for      | GCAAGACCCACCCGTCGAGC                         | 23S rRNA     | riboprobe for Northern              |
| rrn23_3'_T7_rev   | GTAATCGACTCACTATAGGGCGCTCCGCACTTGCTACCC      | 23S rRNA     | riboprobe for Northern              |
| ycf3_exon2_for    | CGGATGTCGGCTCAATCTGAAGG                      | <i>ycf3</i>  | riboprobe for Northern              |
| ycf3_exon2_T7_rev | TAATACGACTCACTATAGGGAGAGGGGTTTCGTTCTAATGCCGA | <i>ycf3</i>  | riboprobe for Northern              |
| ycf3_intron1_for  | AGGGGAAGAAGCACTACGCCG                        | <i>ycf3</i>  | riboprobe for Northern and dot blot |

|                     |                                             |                              |                                     |
|---------------------|---------------------------------------------|------------------------------|-------------------------------------|
| ycf3_intron1_T7_rev | TAATACGACTCACTATAGGGAGACGGCTCCTCCTTAGGTGCAT | <i>ycf3</i>                  | riboprobe for Northern and dot blot |
| ndhF_3'UTR_for      | TCGAACGTGGAATTCATCATC                       | <i>ndhF,ycf1as</i>           | riboprobe for Northern and dot blot |
| ndhF_3'UTR_T7_rev   | GTAATCGACTCACTATAGGGTGAGAAATCTATGGCTCGAATC  | <i>ndhF,ycf1as</i>           | riboprobe for Northern and dot blot |
| ycf1as_for          | GATTCTTCCCCGAGAGATTCC                       | <i>ycf1as</i>                | riboprobe for Northern              |
| ycf1as_T7_rev       | GTAATCGACTCACTATAGGGAAGATGGAATCGACCAAACC    | <i>ycf1as</i>                | riboprobe for Northern              |
| ndhF_for            | TTTTTCACGCCGTCAATAAACC                      | <i>ndhF</i>                  | riboprobe for Northern              |
| ndhF_T7_rev         | TAATACGACTCACTATAGGGAGAAGAGATGCGACTTCCAC    | <i>ndhF</i>                  | riboprobe for Northern              |
| trnlex1             | TTATCAGGGGCGCGCTCTACCACTGAGCTAATAGCCC       | <i>trnI</i>                  | oligoprobe for dot blot             |
| accD.AT.for2        | ATTGCATTTGCGGGTAAAAGAG                      | <i>accD-2</i>                | Editing                             |
| accD.AT.rev2        | GGGAAATGCAAAAAGATGGAAG                      |                              | Editing                             |
| accD.AT.for         | TTCATTTGTAGTGAAAGCGG                        | <i>accD-1</i>                | Editing                             |
| accD.AT.rev         | TTTCGCCTACTACGGATCCC                        |                              | Editing                             |
| ATPHfor2            | ATAAGAGGAGATTGTATGAAA                       | <i>atpF-1</i>                | Editing                             |
| AT7atpF             | GTAATACGACTCACTATAGGGCTAATGGTACGTAATGTAATC  |                              | Editing                             |
| clpP.AT.for         | GTAATGATCCATCAACCCGC                        | <i>clpP-1</i>                | Editing                             |
| clpP.AT.2rev        | TGAACCGCTACAAGATCAAC                        |                              | Editing                             |
| matK.AT.for         | CGTTACCGGTAAAAGATGC                         | <i>matK-2</i>                | Editing                             |
| matK.AT.rev         | AGCGGCGTATCCTTTGTTGC                        |                              | Editing                             |
| matK.seq            | TTTGTTGCCAGAATGCATCTTC                      |                              | Editing                             |
| ndhBfor2            | TCATGATCTGGCATGTACAG                        | <i>ndhB-1,2</i>              | Editing                             |
| ndhBedIII           | ATTTCTGAAGCTCAATCTCTCCCCGGAT                |                              | Editing                             |
| ndhB1seq            | TGAACCATATAGCCAAGAGAAACC                    |                              | Editing                             |
| nb11                | TTCATGCTTGTTGAGTAATAGC                      | <i>ndhB-3,4,5,6,7,8,9,11</i> | Editing                             |
| P12                 | GGTCTAATGAGGCTACTATG                        |                              | Editing                             |
| ndhBrev2            | CTAAAAAAGGCTATCTGAGC                        | <i>ndhB-10,12</i>            | Editing                             |
| AndhB               | GTCGTTGCTTTTCTTCTG                          |                              | Editing                             |
| ndhB3seq            | CAGGCAGGCCTATATTTCTTGG                      |                              | Editing                             |
| ndhDstart5'         | GGTCCAAGTGATCTTGTC                          | <i>ndhD-1</i>                | Editing                             |
| ndhD.AT.3rev        | ACAGTTGAATTAATGGATCG                        |                              | Editing                             |
| ndhDstart5'         | GGTCCAAGTGATCTTGTC                          | <i>ndhD-2</i>                | Editing                             |
| iz                  | AGGAATTAATTCTAACTCCC                        |                              | Editing                             |
| ndhD.AT.for4        | ACGGGATTTACTACTTTAGC                        | <i>ndhD-2,3,4,5</i>          | Editing                             |
| ndhD.AT.for         | CAAGCCTAATTCTATCATAACTCG                    |                              | Editing                             |
| ndhF.AT.for         | AAAACCTTCGCCGATGTGG                         | <i>ndhF-2</i>                | Editing                             |
| ndhF.AT.rev         | GCATTGCTGCAATAGGTCG                         |                              | Editing                             |
| ndhGforM            | TAGAATGGATTTGCCTGGAC                        | <i>ndhG-1</i>                | Editing                             |
| ndhG.AT.rev         | AGAATTATTGAAATGAGTTC                        |                              | Editing                             |
| petL.AT.for         | AAATTTGGTAATTAACACGG                        | <i>petL-1</i>                | Editing                             |
| petL.AT.rev         | ATTTCAATTGAACTTAGGG                         |                              | Editing                             |
| petLseq             | GGTAATTAACACGGTAAGGAACTATCG                 |                              | Editing                             |
| psbF.AT.rev         | CGTTGGATGAACTGCATTGC                        | <i>psbE-1, psbF-1</i>        | Editing                             |
| psbE.AT.for         | ACAGGAGAACGTTCTTTTGC                        |                              | Editing                             |

|                |                                              |                  |                  |
|----------------|----------------------------------------------|------------------|------------------|
| pebEseq        | CACCGGTTTAGCTTACGATGTG                       |                  | Editing          |
| psbZ.AT.for    | GCTTTCCAATTGGCAGTTTTTG                       | <i>psbZ-1</i>    | Editing          |
| psbZ.AT.rev    | CCACCAAGAAGACTAATCCAATCC                     |                  | Editing          |
| rpl23.AT.for   | TTACAGACAAAAGTATTCGGTTATTGG                  | <i>rpl23-1</i>   | Editing          |
| rpl23.AT.rev   | ATAACCCGGTTGAAGCGTAATG                       |                  | Editing          |
| rpoA.AT.for    | GGACACTACAGTGAAGTGTTG                        | <i>rpoA-1</i>    | Editing          |
| rpoA.AT.rev    | CCAGGACCTTGGACACAAATAAG                      |                  | Editing          |
| rpoB.AT.for    | GAAAACCAGTAGGAATATGC                         | <i>rpoB-1,3</i>  | Editing          |
| rpoB.AT.rev    | GTCTCCAATTAATATTCGGCG                        |                  | Editing          |
| rpoB1seq1      | TCCTTTAATGAATTCCTTGAAC                       |                  | Editing          |
| rpoB1seq2      | TCCCCACCTACACAAGAAAATTG                      |                  | Editing          |
| rpoB.AT.3for   | GAGGTGGGTTCCAGAAAAGG                         | <i>rpoB-7</i>    | Editing          |
| rpoB.AT.3rev   | TATCTGTCCTACATTCATGCG                        |                  | Editing          |
| rpoC1.AT.rev   | CGGCTAATTGTTCTCGGATAGC                       | <i>rpoC1</i>     | Editing          |
| rpoC1.AT.for   | CCCAAAGTTTTGTGAACAATGTG                      |                  | Editing          |
| rps12.AT.for   | TACAAGACAGCCAATCCGAAAC                       | <i>rps12-1</i>   | Editing          |
| rps12.AT.rev   | GTTGATTGGATTTGCACCAATG                       |                  | Editing          |
| rps14.AT.for   | TTATAGGGAGAAGAAGAGGC                         | <i>rps14-1,2</i> | Editing          |
| rps14.AT.rev   | TACCAGCTTGATCTTGTTGC                         |                  | Editing          |
| T7 withoverlap | TAATACGACTCACTATAGGGAGACAGG                  | T7 promoter      | RNase protection |
| ndhF footprint | TAAAATGTGACCAATTAACCAACCAACAAACTACTTGCTGTCTC | <i>ndhF</i>      | RNase protection |
| ndhF3RACE      | GTCGCATCTCTTCTTATCTGTTC                      | <i>ndhF</i>      | 3'RACE           |
| ycf1as3RACE    | CGAAAACGAGAGTTACAAATGG                       | <i>ycf1as</i>    | 3'RACE           |

**Supplemental Table 2: Full data set of quantitative RT-PCRs to determine the transcript accumulation levels in *cp29a*- mutant lines**

| gene          | <i>cp29a-1</i>  |            |            | <i>cp29a-6</i>  |            |            |
|---------------|-----------------|------------|------------|-----------------|------------|------------|
|               | log2(mutant/WT) | SD-        | SD+        | log2(mutant/WT) | SD-        | SD+        |
| <i>psbA</i>   | -0,308405573    | 0,01478404 | 0,01487582 | 0,093562711     | 0,04255459 | 0,04212409 |
| <i>matK</i>   | 0,213410958     | 0,01938086 | 0,01954235 | 0,12021388      | 0,03083574 | 0,0306896  |
| <i>rpS12A</i> | 0,531690239     | 0,0663808  | 0,06387123 | 0,644154161     | 0,04833883 | 0,04936726 |
| <i>psbK</i>   | 0,017222846     | 0,04606198 | 0,04609677 | -0,022767693    | 0,02563558 | 0,02571511 |
| <i>psbI</i>   | -0,005469711    | 0,06821807 | 0,06977166 | -0,222581654    | 0,0515945  | 0,05115693 |
| <i>atpA</i>   | -0,367084946    | 0,06682182 | 0,0673772  | -0,292692633    | 0,01948995 | 0,01943572 |
| <i>atpF</i>   | -0,267715948    | 0,03300013 | 0,0332586  | -0,341388625    | 0,07061334 | 0,06803832 |
| <i>atpH</i>   | -0,107714657    | 0,02676288 | 0,02706794 | -0,147510091    | 0,06161574 | 0,06030011 |
| <i>atpI</i>   | -0,217426905    | 0,01605861 | 0,01598818 | -0,233648421    | 0,02642356 | 0,02687418 |
| <i>rpS2</i>   | 0,018046473     | 0,06757473 | 0,07062984 | -0,0654047      | 0,01727369 | 0,01745945 |
| <i>rpoC2</i>  | -0,150293411    | 0,20153942 | 0,19159103 | -0,224824483    | 0,15744568 | 0,14287651 |
| <i>rpoC1</i>  | 0,047295833     | 0,1512611  | 0,14522745 | -0,054993896    | 0,04126455 | 0,04085919 |
| <i>rpoB</i>   | -0,100316417    | 0,31848033 | 0,3396508  | 0,065831149     | 0,04363173 | 0,04255747 |
| <i>petN</i>   | 0,149103371     | 0,05392125 | 0,05444864 | 0,07743167      | 0,05738696 | 0,05568124 |
| <i>psbM</i>   | 0,15158363      | 0,05693476 | 0,05809682 | 0,035228799     | 0,03904684 | 0,03877639 |
| <i>psbD</i>   | -0,321883531    | 0,04254471 | 0,0425286  | -0,030790238    | 0,12136672 | 0,12436366 |
| <i>psbC</i>   | -0,210630757    | 0,10351006 | 0,10540503 | 0,037523469     | 0,04073921 | 0,04073742 |
| <i>psbZ</i>   | 0,079453336     | 0,00835804 | 0,00833688 | -0,09684972     | 0,12449021 | 0,11831917 |
| <i>rps14</i>  | -0,033125219    | 0,02245161 | 0,02241754 | 0,290774926     | 0,02563488 | 0,02571099 |
| <i>psaB</i>   | -0,241193537    | 0,04150941 | 0,04110315 | -0,195215167    | 0,04407312 | 0,04429442 |
| <i>psaA</i>   | -0,416966427    | 0,03649244 | 0,03635349 | -0,171740847    | 0,12313123 | 0,11608167 |
| <i>ycf3</i>   | 0,300859295     | 0,05607927 | 0,05668101 | -0,201269046    | 0,10149144 | 0,096555   |
| <i>rps4</i>   | 0,307280784     | 0,06610499 | 0,06916151 | 0,115917602     | 0,02201703 | 0,02214886 |
| <i>ndhJ</i>   | -0,03887838     | 0,06587592 | 0,067027   | 0,007613683     | 0,24467753 | 0,22979342 |
| <i>ndhK</i>   | 0,050943594     | 0,01656246 | 0,01674604 | 0,132131288     | 0,1191684  | 0,11239532 |
| <i>ndhC</i>   | -0,130360945    | 0,01778333 | 0,0178125  | -0,089006104    | 0,15387285 | 0,14079193 |
| <i>atpE</i>   | 0,230048813     | 0,15197693 | 0,16779084 | 0               | 0,13903597 | 0,13696237 |
| <i>atpB</i>   | 0,032077171     | 0,01539415 | 0,01537261 | -0,032960949    | 0,13181929 | 0,12379318 |
| <i>rbcL</i>   | -0,017594895    | 0,0366103  | 0,03619888 | 0,206023104     | 0,07638347 | 0,07948386 |
| <i>accD</i>   | 0,046162        | 0,21616346 | 0,19112171 | 0,72262421      | 0,24479733 | 0,21632904 |
| <i>psaI</i>   | 0,023364043     | 0,10929604 | 0,10182696 | -0,054362759    | 0,00355328 | 0,00354573 |
| <i>ycf4</i>   | -0,129247068    | 0,06968094 | 0,06716335 | 0,06074097      | 0,02881204 | 0,02935022 |
| <i>cemA</i>   | -0,064759941    | 0,047116   | 0,04749303 | 0,186728866     | 0,01650058 | 0,01659818 |
| <i>petA</i>   | 0,001581193     | 0,05650531 | 0,05459648 | -0,029828969    | 0,00886032 | 0,00883598 |
| <i>psbJ</i>   | -0,018906986    | 0,02012177 | 0,02033593 | -0,09632326     | 0,0272173  | 0,02742314 |
| <i>psbL</i>   | 0,054032108     | 0,03476806 | 0,03405198 | -0,044824096    | 0,00837072 | 0,00841431 |
| <i>psbF</i>   | 0,206952357     | 0,2158894  | 0,24993588 | 0,115192426     | 0,04524851 | 0,04565104 |
| <i>psbE</i>   | -0,071311688    | 0,03859082 | 0,03860894 | -0,065139323    | 0,00986995 | 0,00991599 |
| <i>petI</i>   | -0,028010491    | 0,03883234 | 0,03828736 | -0,185182292    | 0,0160937  | 0,01604089 |
| <i>petG</i>   | -0,211498102    | 0,02541062 | 0,02522903 | -0,238503994    | 0,03510587 | 0,03580378 |
| <i>psaJ</i>   | 0,763779691     | 0,02574896 | 0,02595166 | 0,17137016      | 0,00236332 | 0,00235979 |
| <i>rpL33</i>  | -0,025535863    | 0,0333036  | 0,03370574 | 0,056011589     | 0,0112724  | 0,01129044 |
| <i>rpS18</i>  | 0,07638034      | 0,18907958 | 0,17948231 | 0,207970294     | 0,02501149 | 0,02463304 |



|               |              |            |            |              |            |            |
|---------------|--------------|------------|------------|--------------|------------|------------|
| <i>rpL20</i>  | 0,131925944  | 0,07457473 | 0,07264815 | -0,308143452 | 0,06589417 | 0,068445   |
| <i>clpP1</i>  | 0,486495225  | 0,12236073 | 0,13139575 | 0,076352739  | 0,07841435 | 0,08105609 |
| <i>psbB</i>   | -0,251227696 | 0,04442311 | 0,04481071 | -0,128347889 | 0,05507769 | 0,05606247 |
| <i>psbT</i>   | -0,165467543 | 0,02982736 | 0,030238   | 0,138611296  | 0,05593157 | 0,05496006 |
| <i>psbN</i>   | -0,012050104 | 0,02513407 | 0,02510576 | 0,016616281  | 0,01685183 | 0,01695135 |
| <i>psbH</i>   | -0,131929841 | 0,02644396 | 0,02692147 | -0,22849194  | 0,04317011 | 0,0431875  |
| <i>petB</i>   | -0,303287636 | 0,00675474 | 0,00674493 | -0,081101099 | 0,04289848 | 0,04302192 |
| <i>petD</i>   | -0,230789068 | 0,01943513 | 0,01947918 | -0,070224263 | 0,02625929 | 0,02666277 |
| <i>rpoA</i>   | 0,046038435  | 0,01595019 | 0,01597726 | 0,069561265  | 0,04070504 | 0,04083132 |
| <i>rpS11</i>  | 0,08761172   | 0,03641386 | 0,03672384 | 0,144784122  | 0,06378685 | 0,06431317 |
| <i>rpL36</i>  | 0,052028393  | 0,02203107 | 0,02184349 | 0,117113787  | 0,00932581 | 0,00934367 |
| <i>rpS8</i>   | 0,394251839  | 0,04795939 | 0,04693499 | 0,087033672  | 0,02559715 | 0,02565035 |
| <i>rpL14</i>  | 0,250166105  | 0,06450276 | 0,06612289 | 0,054081206  | 0,07115067 | 0,0703307  |
| <i>rpL16</i>  | 0,324651661  | 0,0317053  | 0,03143824 | 0,208342387  | 0,05250051 | 0,05122393 |
| <i>rpS3</i>   | 0,182348368  | 0,08945457 | 0,09233599 | 0,109338423  | 0,05878661 | 0,05765654 |
| <i>rpL22</i>  | 0,235194513  | 0,05578907 | 0,05418887 | 0,315000977  | 0,04126901 | 0,04124601 |
| <i>rpS19</i>  | -0,015357612 | 0,09606281 | 0,09772183 | -0,077928612 | 0,07066856 | 0,06820275 |
| <i>rpL2</i>   | 0,308818476  | 0,01318726 | 0,01326008 | -0,084075631 | 0,03915935 | 0,03826957 |
| <i>rpL23</i>  | 0,305669229  | 0,14165393 | 0,14080905 | -0,063983936 | 0,01262681 | 0,01259567 |
| <i>ycf2.1</i> | 0            | 0,03397167 | 0,0334639  | -0,038455791 | 0,00996405 | 0,00991006 |
| <i>ycf15</i>  | -0,198651724 | 0,03696535 | 0,0371376  | 0,029073812  | 0,02515729 | 0,02493643 |
| <i>ndhB</i>   | -0,018755938 | 0,05377252 | 0,05442461 | -0,067606257 | 0,06681117 | 0,06866137 |
| <i>rpS7</i>   | -0,145221257 | 0,03107372 | 0,03152018 | -0,248746672 | 0,03989009 | 0,04049651 |
| <i>ycf1</i>   | -0,402592043 | 0,0318257  | 0,03219067 | -0,289965968 | 0,06624097 | 0,06417544 |
| <i>ndhF</i>   | -0,551391306 | 0,01664637 | 0,01658441 | -0,327438091 | 0,09316085 | 0,09289452 |
| <i>rpL32</i>  | 0,255940045  | 0,02217327 | 0,02224298 | 0,02908994   | 0,02216244 | 0,02229649 |
| <i>ccsA</i>   | 0,20440134   | 0,10404229 | 0,11136342 | 0,117909613  | 0,08503234 | 0,08188703 |
| <i>ndhD</i>   | 0,098248166  | 0,04540946 | 0,04677473 | 0,500812594  | 0,1651471  | 0,16539321 |
| <i>psaC</i>   | -0,011338638 | 0,02063322 | 0,02086726 | -0,0813676   | 0,00882306 | 0,00887404 |
| <i>ndhE</i>   | -0,383651637 | 0,06250327 | 0,06031794 | -0,2176313   | 0,08082534 | 0,07774404 |
| <i>ndhG</i>   | -0,169945487 | 0,10033964 | 0,09585357 | 0,035260195  | 0,04717738 | 0,04806869 |
| <i>ndhI</i>   | -0,248699429 | 0,13977635 | 0,14349788 | 0,285342712  | 0,1318692  | 0,14141658 |
| <i>ndhA</i>   | -0,409827066 | 0,01862744 | 0,01854095 | -0,077049555 | 0,0142767  | 0,01434018 |
| <i>ndhH</i>   | -0,267277721 | 0,1124837  | 0,10888585 | 0,031236453  | 0,05105751 | 0,05038942 |
| <i>rpS15</i>  | 0,036619797  | 0,0712452  | 0,07087126 | -0,15108761  | 0,02534018 | 0,02537962 |
| 18S           | 0,077374429  | 0,01242462 | 0,01241586 | -0,037773557 | 0,01875914 | 0,01864399 |
| 18S           | 0,032492365  | 0,01639459 | 0,01650402 | 0,134186498  | 0,01838876 | 0,01846863 |
| 18S           | 0,001295177  | 0,024078   | 0,02399951 | 0,006918298  | 0,0147918  | 0,01491309 |
| QC16S         | 0,053195244  | 0,10235864 | 0,09999512 | 0,038775818  | 0,02169949 | 0,02184592 |
| QC16S         | -0,079472866 | 0,04647324 | 0,04725979 | 0,048830631  | 0,04918109 | 0,05047213 |
| QC16S         | -0,063326767 | 0,05761224 | 0,05726447 | -0,012080439 | 0,0337441  | 0,03423117 |
| QC23S         | 0,001783324  | 0,03809949 | 0,03735972 | -0,230727281 | 0,11245258 | 0,12161601 |
| QC23S         | 0,116756883  | 0,02441273 | 0,02419174 | 0,051973391  | 0,0350072  | 0,03463573 |
| QC23S         | 0,203585052  | 0,02168644 | 0,02192682 | 0,250963885  | 0,04628146 | 0,04777931 |

**Supplemental Table 3: Run on transcription experiments in *cp29a* mutants.** Quantification of five independent experiments with wild-type (Col-0) and two with the *cp29a-1* mutant

|              | Col-0          |                 |                 |                 |                 | <i>cp29a</i>    |                |                      |                      |                      |                        |
|--------------|----------------|-----------------|-----------------|-----------------|-----------------|-----------------|----------------|----------------------|----------------------|----------------------|------------------------|
|              | Col-0<br>exp 1 | Col-0<br>exp 25 | Col-0<br>exp 26 | Col-0<br>exp 27 | Col-0<br>exp 29 | mean<br>(Col-0) | +SD<br>(Col-0) | <i>cp29a</i><br>exp1 | <i>cp29a</i><br>exp2 | meanc<br><i>p29a</i> | +SD<br>( <i>cp29</i> ) |
| <i>accD</i>  | 1,44           | 0,66            | 1,22            | 1,79            | 2,64            | 1,55            | 0,73           | 1,03                 | 1,61                 | 1,32                 | 0,41                   |
| <i>atpB</i>  | 1,20           | 1,04            | 1,45            | 1,89            | 2,10            | 1,54            | 0,45           | 1,67                 | 2,17                 | 1,92                 | 0,35                   |
| <i>atpF</i>  | 1,48           | 1,32            | 2,30            | 2,63            | 2,45            | 2,04            | 0,60           | 1,44                 | 1,85                 | 1,64                 | 0,29                   |
| <i>atpH</i>  | 2,55           | 1,51            | 2,01            | 1,86            | 1,51            | 1,89            | 0,43           | 1,27                 | 1,03                 | 1,15                 | 0,17                   |
| <i>clpP</i>  | 0,88           | 0,29            | 0,29            | 0,40            | 0,46            | 0,46            | 0,24           | 0,62                 | 0,56                 | 0,59                 | 0,04                   |
| <i>ndhB</i>  | 1,17           | 1,78            | 3,34            | 2,04            | 1,84            | 2,03            | 0,80           | 1,64                 | 2,06                 | 1,85                 | 0,30                   |
| <i>ndhI</i>  | 1,77           | 0,75            | 1,39            | 1,37            | 1,73            | 1,40            | 0,41           | 0,95                 | 1,20                 | 1,08                 | 0,17                   |
| <i>petA</i>  | 1,12           | 0,94            | 1,47            | 1,66            | 1,66            | 1,37            | 0,33           | 1,44                 | 1,55                 | 1,49                 | 0,07                   |
| <i>petB</i>  | 2,75           | 1,90            | 2,83            | 2,30            | 1,71            | 2,30            | 0,49           | 1,61                 | 1,94                 | 1,78                 | 0,23                   |
| <i>petD</i>  | 4,13           | 1,44            | 1,84            | 1,16            | 1,08            | 1,93            | 1,27           | 1,10                 | 0,96                 | 1,03                 | 0,09                   |
| <i>psaA</i>  | 0,70           | 2,06            | 3,69            | 3,09            | 3,46            | 2,60            | 1,23           | 3,71                 | 4,94                 | 4,33                 | 0,87                   |
| <i>psaB</i>  | 25,54          | 3,49            | 3,07            | 3,61            | 3,47            | 7,84            | 9,90           | 3,65                 | 4,94                 | 4,30                 | 0,91                   |
| <i>psaC</i>  | 7,31           | 0,55            | 0,81            | 0,76            | 0,99            | 2,08            | 2,92           | 0,62                 | 0,57                 | 0,60                 | 0,03                   |
| <i>psbA</i>  | 0,90           | 37,13           | 26,03           | 22,09           | 18,15           | 20,86           | 13,21          | 24,04                | 24,38                | 24,21                | 0,24                   |
| <i>psbD</i>  | 1,52           | 4,50            | 6,24            | 6,35            | 4,17            | 4,56            | 1,96           | 7,32                 | 9,77                 | 8,54                 | 1,73                   |
| <i>psbE</i>  | 1,96           | 0,77            | 0,70            | 0,76            | 0,75            | 0,99            | 0,54           | 0,91                 | 1,13                 | 1,02                 | 0,15                   |
| <i>psbK</i>  | 0,58           | 1,31            | 2,30            | 1,70            | 2,35            | 1,65            | 0,74           | 1,37                 | 1,50                 | 1,44                 | 0,09                   |
| <i>rbcL</i>  | 2,18           | 3,53            | 3,84            | 2,19            | 1,69            | 2,69            | 0,94           | 1,55                 | 2,22                 | 1,89                 | 0,47                   |
| <i>rpoB</i>  | 1,11           | 0,47            | 0,52            | 0,61            | 0,81            | 0,70            | 0,26           | 0,87                 | 0,78                 | 0,82                 | 0,06                   |
| <i>rps14</i> | 1,75           | 2,92            | 2,44            | 3,56            | 3,82            | 2,90            | 0,84           | 2,88                 | 2,85                 | 2,86                 | 0,02                   |
| <i>rps16</i> | 0,47           | 1,05            | 1,49            | 2,03            | 3,03            | 1,62            | 0,98           | 1,53                 | 0,93                 | 1,23                 | 0,43                   |
| <i>rps4</i>  | 2,23           | 1,84            | 1,74            | 1,96            | 2,47            | 2,05            | 0,30           | 2,84                 | 1,39                 | 2,12                 | 1,02                   |
| <i>rps8</i>  | 0,85           | 0,32            | 0,39            | 0,57            | 0,70            | 0,57            | 0,22           | 0,72                 | 0,83                 | 0,77                 | 0,08                   |
| <i>rrn16</i> | 21,96          | 17,61           | 13,59           | 13,09           | 16,33           | 16,51           | 3,58           | 21,42                | 18,08                | 19,75                | 2,36                   |
| <i>trnK1</i> | 4,12           | 2,73            | 3,73            | 5,68            | 3,73            | 4,00            | 1,07           | 3,79                 | 4,09                 | 3,94                 | 0,21                   |
| <i>trnK2</i> | 1,60           | 1,15            | 1,96            | 3,54            | 4,31            | 2,51            | 1,35           | 2,31                 | 1,88                 | 2,10                 | 0,31                   |
| <i>trnL</i>  | 1,82           | 3,87            | 4,28            | 5,95            | 5,38            | 4,26            | 1,60           | 3,18                 | 1,95                 | 2,56                 | 0,87                   |
| <i>ycf1</i>  | 1,06           | 1,06            | 0,99            | 1,01            | 1,24            | 1,07            | 0,10           | 1,36                 | 0,67                 | 1,01                 | 0,49                   |
| <i>ycf10</i> | 0,70           | 0,93            | 2,14            | 1,66            | 1,72            | 1,43            | 0,60           | 1,37                 | 0,89                 | 1,13                 | 0,34                   |
| <i>ycf2</i>  | 1,70           | 0,40            | 0,35            | 0,66            | 1,14            | 0,85            | 0,57           | 0,83                 | 1,33                 | 1,08                 | 0,35                   |
| <i>ycf5</i>  | 1,46           | 0,68            | 1,56            | 2,02            | 3,11            | 1,76            | 0,89           | 1,99                 | 1,57                 | 1,78                 | 0,30                   |

Shown are differential values for each transcript, calculated by dividing the sum of the spot intensities of all transcripts analyzed by the spot intensity of each single transcript. exp = independent experiments

**Supplemental Table 4: Quantitative RT-PCRs amplifying spliced and unspliced forms of the 12 chloroplast intron containing mRNAs in *cp29a* and *cp31a* mutant lines.** Values were obtained by dividing quantities measured for the mutants with the ones measured for the wild-type (WT). Data were normalized to cytosolic 18S rRNA.

| PCR product                | <i>cp29a-1</i> |        |        | <i>cp29a-6</i> |        |        | <i>cp31a-1</i> |        |        | <i>cp31a-3</i> |        |        |
|----------------------------|----------------|--------|--------|----------------|--------|--------|----------------|--------|--------|----------------|--------|--------|
|                            | ratiomutant/WT | STD+   | STD-   |
| <i>16S</i>                 | 0,8727         | 0,0282 | 0,0273 | 1,0572         | 0,0210 | 0,0208 | 0,7308         | 0,0146 | 0,0142 | 0,8533         | 0,0764 | 0,0675 |
| <i>23S</i>                 | 0,9611         | 0,0722 | 0,0632 | 0,9275         | 0,0722 | 0,0625 | 1,2152         | 0,2257 | 0,1807 | 1,7317         | 0,0791 | 0,0753 |
| 18S nucleus                | 1,0000         | 0,0190 | 0,0187 | 1,0000         | 0,0317 | 0,0311 | 1,0000         | 0,0213 | 0,0207 | 1,0000         | 0,0213 | 0,0209 |
| <i>atpF</i>                | 0,8806         | 0,0155 | 0,0151 | 0,8855         | 0,0364 | 0,0350 | 0,5959         | 0,0120 | 0,0119 | 0,8738         | 0,0435 | 0,0419 |
| <i>atpFintron</i> exon2    | 0,9799         | 0,1059 | 0,0901 | 0,8429         | 0,0496 | 0,0450 | 0,6467         | 0,2060 | 0,1409 | 0,8644         | 0,0309 | 0,0300 |
| <i>rpoC1</i>               | 0,8907         | 0,0686 | 0,0612 | 0,9349         | 0,0306 | 0,0302 | 0,6717         | 0,1917 | 0,1845 | 0,9555         | 0,0842 | 0,0780 |
| <i>rpoC1intron</i> exon2   | 0,9236         | 0,0127 | 0,0124 | 0,9684         | 0,1455 | 0,1133 | 0,4909         | 0,0452 | 0,0387 | 0,7199         | 0,0665 | 0,0641 |
| <i>ycf3</i> exon2 exon3    | 0,7119         | 0,4110 | 0,4049 | 1,1257         | 0,0875 | 0,0871 | 0,6252         | 0,1601 | 0,1317 | 1,3018         | 0,2477 | 0,2281 |
| <i>ycf3</i> intron2 exon3  | 0,8227         | 0,0682 | 0,0663 | 1,0254         | 0,1549 | 0,1331 | 0,5388         | 0,0716 | 0,0600 | 0,7980         | 0,0255 | 0,0246 |
| <i>ycf3</i> exon1 exon2    | 0,8105         | 0,1191 | 0,0984 | 0,9740         | 0,0332 | 0,0319 | 0,3051         | 0,0214 | 0,0197 | 0,4320         | 0,0928 | 0,0792 |
| <i>ycf3</i> intron1 exon2  | 0,7546         | 0,1551 | 0,1121 | 0,8243         | 0,0430 | 0,0414 | 0,8365         | 0,1251 | 0,1115 | 1,2454         | 0,0219 | 0,0217 |
| <i>clpP</i> exon2 exon3    | 1,2360         | 0,1877 | 0,1814 | 0,9199         | 0,0541 | 0,0538 | 0,8614         | 0,0213 | 0,0213 | 1,4173         | 0,0557 | 0,0555 |
| <i>clpP</i> intron2 exon3  | 1,1008         | 0,0138 | 0,0134 | 1,0507         | 0,0665 | 0,0630 | 0,6604         | 0,0729 | 0,0687 | 0,9680         | 0,0071 | 0,0070 |
| <i>clpP</i> exon1 exon2    | 1,1211         | 0,0418 | 0,0390 | 1,0157         | 0,0264 | 0,0251 | 1,5097         | 0,1494 | 0,1265 | 1,5724         | 0,0392 | 0,0382 |
| <i>clpP</i> intron1 exon2  | 0,9329         | 0,2486 | 0,2082 | 1,2235         | 0,0471 | 0,0451 | 0,7408         | 0,1410 | 0,1040 | 0,8943         | 0,0374 | 0,0356 |
| <i>petB</i>                | 0,7354         | 0,0124 | 0,0124 | 0,8373         | 0,0370 | 0,0360 | 0,8454         | 0,1073 | 0,0896 | 0,6555         | 0,0175 | 0,0168 |
| <i>petBintron</i> exon2    | 0,7660         | 0,0105 | 0,0102 | 0,8150         | 0,0512 | 0,0466 | 0,6697         | 0,0772 | 0,0645 | 0,7140         | 0,0282 | 0,0265 |
| <i>petD</i>                | 0,8294         | 0,1345 | 0,1283 | 1,1026         | 0,0545 | 0,0540 | 0,7577         | 0,2665 | 0,2040 | 0,5173         | 0,5348 | 0,4551 |
| <i>petDintron</i> exon2    | 0,8139         | 0,0338 | 0,0336 | 0,8762         | 0,0337 | 0,0314 | 0,6058         | 0,0441 | 0,0409 | 0,7382         | 0,2002 | 0,1686 |
| <i>rpl16</i>               | 1,1823         | 0,1165 | 0,1040 | 1,0234         | 0,0485 | 0,0461 | 0,6157         | 0,1307 | 0,0939 | 1,0680         | 0,1169 | 0,1142 |
| <i>rpl16intron</i> exon2   | 1,1201         | 0,0310 | 0,0298 | 1,2543         | 0,0156 | 0,0153 | 0,6880         | 0,0975 | 0,0941 | 1,1508         | 0,0525 | 0,0493 |
| <i>rpl2</i>                | 0,9288         | 0,0247 | 0,0239 | 1,0241         | 0,0413 | 0,0397 | 0,6247         | 0,0876 | 0,0703 | 0,9810         | 0,0506 | 0,0479 |
| <i>rpl2intron</i> exon2    | 1,0776         | 0,0566 | 0,0528 | 1,0899         | 0,0432 | 0,0416 | 0,6906         | 0,0165 | 0,0161 | 1,1150         | 0,0110 | 0,0109 |
| <i>ndhB</i>                | 0,8799         | 0,0182 | 0,0178 | 1,0432         | 0,0451 | 0,0442 | 0,3799         | 0,0247 | 0,0243 | 0,6170         | 0,0268 | 0,0253 |
| <i>ndhBintron</i> exon2    | 1,1804         | 0,0164 | 0,0160 | 1,3764         | 0,0916 | 0,0890 | 0,8843         | 0,0206 | 0,0203 | 0,9513         | 0,0822 | 0,0791 |
| <i>rps12</i> exon2 exon3   | 1,0139         | 0,0638 | 0,0634 | 0,8713         | 0,0753 | 0,0714 | 0,7006         | 0,0787 | 0,0762 | 0,8590         | 0,1613 | 0,1354 |
| <i>rps12</i> intron2 exon3 | 0,8859         | 0,0427 | 0,0393 | 0,9551         | 0,0286 | 0,0279 | 0,6936         | 0,0151 | 0,0147 | 0,6768         | 0,0150 | 0,0146 |
| <i>rps12</i> exon1 exon2   | 1,5027         | 0,0754 | 0,0705 | 1,3563         | 0,0259 | 0,0257 | 0,8103         | 0,0433 | 0,0420 | 1,5826         | 0,0420 | 0,0404 |
| <i>rps12</i> intron1 exon2 | 0,8149         | 0,0828 | 0,0800 | 0,8280         | 0,0530 | 0,0493 | 0,4355         | 0,0229 | 0,0214 | 0,7407         | 0,0278 | 0,0260 |
| <i>ndhA</i>                | 0,7367         | 0,0179 | 0,0174 | 0,7929         | 0,0179 | 0,0172 | 0,3948         | 0,0193 | 0,0191 | 0,4142         | 0,0132 | 0,0129 |
| <i>ndhAintron</i> exon2    | 0,8606         | 0,0332 | 0,0321 | 0,9710         | 0,0411 | 0,0392 | 0,4344         | 0,0581 | 0,0556 | 0,5289         | 0,0135 | 0,0134 |
